# Supplementary material
Source: ML conference proceedings conference paper supplement (https://openreview.net/forum?id=jooPcatnVF)
Supplement: supplementary_material [file attachment]

---

# Supplementary Material

---

Anonymous Author(s)

Affiliation

Address

email

## A More details of Multimodal Pipeline

### A.1 Image Encoder

In this work, we focus on patch features and apply vision transformer based models (ViTs) by [15] as our visual encoder backbones. We split input image into a sequence of patches and adopt the linear projection embedding of patch features  $v_q$ , which simplifies the step for fusing with text embedding. Following the vision-language models, we train our model with multiple popular ViTs to examine the influence of image encoder in OOD detection backpropagation process.

### A.2 Knowledge Retrieval Module

Given the caption  $S$ , we parse it into triplets in the form of  $T^{id} = \langle o(c), r(c), o'(c) \rangle$ , where  $o(c)$  and  $o'(c)$  are concepts  $\in C^{id}$ , and  $r(c)$  is the relation(s) between them, i.e.,  $\langle \text{man}, \text{riding}, \text{bicycle} \rangle$ . In our example, the seed triplets (ID triplets) parsed from the caption are  $\langle \text{man}, \text{riding}, \text{bicycle} \rangle$  and  $\langle \text{bicycle}, \text{down}, \text{street} \rangle$ . Then we construct knowledge graph by bridging these triplets with external open knowledge including domain and commonsense knowledge graphs, e.g., ConceptNet [13]. ConceptNet provides a large scale commonsense knowledge with over 21 million edges by 36 type of relations connecting 8 million nodes, i.e., IsA, UsedFor, AtLocation. In this study, to complete our knowledge graph, we collect concepts by querying from ConceptNet using  $o(c)$ ,  $o'(c)$  and  $rel_i$  where  $i \in [0, 36]$  and integrate extracted triplets to seed triplets. For example, given "street" as  $o(c)$  and "AtLocation" as  $rel_i$ , we will extract the related concepts are located at street to form triple  $t_i$ . Specifically, we query explicit knowledge triplets of  $o(c)$  and  $o'(c)$  from ConceptNet to form  $T^{cn}$ , i.e.,  $\langle \text{bicycle}, \text{used for}, \text{transport} \rangle$ . Finally, these knowledge triplets  $\in T = T^{cn} \cup T^{id}$  are encoded as language features, such as  $l_j$  using a language encoder (e.g., BERT[3]).

### A.3 Multimodal Fusion Encoder

We consider our proposed OOD detection layer as a plug module to different vision-language architectures. In ViLT and CLIP, we sum the visual and textual embeddings with incorporating  $s(\cdot)$  as in Eq 4 of the main paper, and pass them to a standard L-depth transformer. Considering the BLIP backbones, we perform a two-stream transformer pipeline consisting of stacked multiple layers to joint vision and knowledge textual representations. For each layer, we have self-attention unit and merged cross-attention unit which integrates vision and knowledge semantic information and the alignments across them, and a position-wise feed-forward network.

Moreover, we update the image and language embedding outputs of themselves previous layer as queries and concatenate them together as keys and values. To further improve the performance of attention function, we use a multi-head attention which is composed by multiple paralleled attention function in each head. The feed-forward layer transform the outputs of multi-head attention through two fully-connected layers with GeLU activation.

## 35 B More details of Training objectives

36 We mainly introduce our training objectives in our pipeline in this section, including image text  
37 matching (ITM) and masked language modeling (MLM).

### 38 B.1 Image Text Matching

39 To incorporate both the vision and the language representations, we adopt ITM which is widely used  
40 in previous VL studies. Given an image and text of triple pair  $\langle v_q, l_j \rangle$ , ITM predicts whether they are  
41 matched as positive examples or not, and it is a binary classification problem with the loss function in  
42 Equation 5 of the main paper. We assume that each image and ID triple pair  $\langle v_q, l_j \rangle$ , as a positive  
43 example. The negative pairs are constructed through batch-sampling.

### 44 B.2 Masked Language Modeling

45 MLM utilizes vision features and text features of ID concepts and relations to predict the masked  
46 tokens in the caption sentence  $S$ . Following most VL models, we randomly masked some tokens  
47 in  $S$  replacing as  $y^{mask}$  and predict them with their visual and textual features. Since some tokens  
48 are replaced with "[mask]", the OOD score  $s(\cdot)$  is changed based on the random masks. Thus, we  
49 incorporate  $s(\cdot)$  to calculate the predicted probability for a masked token similar to Eq 4 of the main  
50 paper, and MLM loss is written as

$$\mathcal{L}_{mlm} = \mathbb{E}_{(v, \hat{l}) \sim D} \mathcal{H}(y_{mlm}, p(v, \hat{l})) \quad (1)$$

51 where  $\mathcal{H}$  denotes the cross-entropy,  $y_{mlm}$  is a one-hot vector where the ground truth tokens are with  
52 probabilities of 1,  $\hat{l}$  denotes the masked text.

## 53 C More Experiments

54 In this section, we show implement details, more experiments on ablation studies, and more qualitative  
55 analysis of our proposed VK-OOD models.

### 56 C.1 Implement details

57 **Datasets.** Following the practical settings, we adopt the training strategies of pre-training on more  
58 data and fine-tuning on downstream tasks. We pre-train on three datasets, including COCO [5],  
59 Visual Genome [4], and SBU Captions [9] with total of 1M images and 6.8M image-caption pairs, as  
60 approximate 30% less than the baseline (ViLT). Each caption is parsed to 1 - 3 triplets and augmented  
61 with 5 external knowledge triplets. For downstream datasets, we use Flickr30k [10] and COCO  
62 for image-text retrieval, VQA v2 [1] and OKVQA [8] for visual question answering and ablation  
63 studies, and NLVR2 [14] for visual reasoning. We resize each image to the size of  $224 \times 224$  by  
64 center-cropping. In the merged attention module, each multimodal encoder layer consists of one  
65 multi-head self-attention block and one feedforward block, and total number of identical layers is 12.

66 **Encoder backbones.** First, we retrieve explicit knowledge triplets in pre-processing, by using  
67 ConceptNet Numberbatch<sup>1</sup>. Next, for ViLT, we use RoBERTa [6] as text encoder and ViT-B/32 by  
68 [11] as visual encoder. To scale with CLIP, we use CLIP-ViT-B/32 [11] as both backbones. Then, we  
69 follow the BLIP design with BERT-base as text encoder and ViT-B/16 as visual encoder.

70 **Network training.** We pre-train the model for 10 epochs, and use AdamW optimizer designed by [7]  
71 with the learning rate of  $1e-4$  and weight decay of  $1e-2$ . The warm-up ratio of learning rate is 10% of  
72 the total training steps, and the learning rate was decayed linearly to 0 in the rest steps. Then, we  
73 finetune our model for 5 epochs with learning rate of  $2e-4$  for all downstream tasks. In addition, we  
74 apply RandAugment [2] as augmentation strategy in finetuning steps. We pre-train and fine-tune both  
75 on 8 NVIDIA RTX 2080Ti GPUs, and inference on 1 NVIDIA RTX 2080Ti GPU.

---

<sup>1</sup><https://github.com/commonsense/conceptnet-numberbatch>

| Model      | COCO        |             |             |             |             |             | F30k        |             |             |             |             |             |
|------------|-------------|-------------|-------------|-------------|-------------|-------------|-------------|-------------|-------------|-------------|-------------|-------------|
|            | TR          |             |             | IR          |             |             | TR          |             |             | IR          |             |             |
|            | R@1         | R@5         | R@10        |
| ViLT       | 61.8        | 86.2        | 92.6        | 41.3        | 72.0        | 82.5        | 81.4        | 95.6        | 97.6        | 61.9        | 86.8        | 92.8        |
| UNITER     | 64.4        | 87.4        | 93.1        | 50.3        | 78.5        | 87.2        | 85.9        | 97.1        | 98.8        | 72.5        | 92.4        | 96.1        |
| ALBEF      | 73.1        | 91.4        | 96.0        | 56.8        | 81.5        | 89.2        | 94.3        | 99.4        | 99.8        | 82.8        | 96.7        | 98.4        |
| VinVL      | 74.6        | 92.6        | 96.3        | 58.1        | 83.2        | 90.1        | -           | -           | -           | -           | -           | -           |
| BLIP       | 80.6        | <b>95.2</b> | <b>97.6</b> | <b>63.1</b> | <b>85.3</b> | 91.1        | <b>96.6</b> | <b>99.8</b> | <b>100</b>  | <b>87.2</b> | <b>97.5</b> | <b>98.8</b> |
| Ours(ViLT) | 73.8        | 91.4        | 96          | 52.4        | 81.3        | 90.1        | 85.9        | 97.1        | 97.6        | 80.1        | 94.6        | 96.7        |
| Ours(CLIP) | 69.8        | 87.5        | 93.6        | 48.8        | 78.5        | 82.5        | 92.3        | 98.4        | 99.5        | 79.8        | 92.1        | 96.4        |
| Ours(BLIP) | <b>80.7</b> | <b>95.1</b> | <b>96.8</b> | <b>62.9</b> | <b>84.8</b> | <b>92.8</b> | <b>96.4</b> | <b>99.6</b> | <b>99.8</b> | <b>86.3</b> | <b>97.1</b> | <b>98.8</b> |

Table 1: Detailed results of image-text retrieval tasks on COCO and Flickr30k datasets. Our model with different backbones outperforms other models and achieve the best and second-best results.

| Model  | Objectives | VQA         | Flickr30k   |             |
|--------|------------|-------------|-------------|-------------|
|        |            | test-dev    | TR@1        | IR@1        |
| ViLT   | ITM        | 70.6        | 82.1        | 65.6        |
| ViLT   | MLM        | 72.8        | -           | -           |
| ViLT   | ITM+MLM    | 74.2        | 88.1        | 74.1        |
| VK-OOD | ITM        | 72.1        | 84.5        | 69.8        |
| VK-OOD | MLM        | 73.4        | -           | -           |
| VK-OOD | ITM+MLM    | <b>74.8</b> | <b>89.0</b> | <b>77.2</b> |

Table 2: Ablation study experiment results of VK-OOD model. ViLT is our implementation without explicit knowledge and OOD detection layer. ITM is image-text matching, and MLM is masked language modeling. Results on VQA are on test-dev set. Both downstream results are in zero-shot settings. The bold values mean the best model in the table. Comparing with the baselines, our model with OOD detection layer outperforms on all objectives with two datasets. Training on combinations of objectives improves model performance.

## 76 C.2 More experimental results

77 **Detailed results of image-text retrieval tasks.** We provided detailed results on COCO and F30K  
78 datasets, as shown in Table 1. The model of OOD detection layer with ViLT has significant improve-  
79 ments in image retrieval and text retrieval tasks. Overall, our model achieved the best and second-best  
80 results on both datasets comparing to other SOTA models.

81 **Training Objectives with OOD detection Layer.** To evaluate our proposed model, we perform  
82 more ablations with the default training settings of the baseline and our model mentioned in Section  
83 3.3 of the main paper. We consider different combinations of train objectives and evaluate in zero-  
84 shot settings. We observe our model performance on training objectives. Note that, ViLT is our  
85 implementation with the same subset of training datasets. Our raw results are presented in Table  
86 2. We train on pre-train datasets with  $\mathcal{L}_{itm}$  in Equation 7,  $\mathcal{L}_{mlm}$  in Equation 8 and  $\mathcal{L}$  in Equation 9.  
87 The results in Table 2 show that training on image-text matching and masked language modeling is  
88 beneficial for both downstream tasks comparing to the baseline model, especially, there is promising  
89 improvements in image retrieval and text retrieval tasks. Thus, it is beneficial to train on both ITM  
90 and MLM for filtering outlier concepts and improve performance on downstream tasks.

## 91 C.3 More Qualitative Analysis

92 As the feature maps shown in Fig 2 of the main paper, our model result demonstrates more clusters  
93 can be identified over the multimodal features extracted by VK-OOD. Thus, it illustrates that our  
94 model is able to detect outliers and cluster images closest to the corresponding  $\mu_k$  with image and  
95 explicit knowledge triplets. Figure 1a and Figure 1b are examples that the nearest images in each  
96 cluster.

97 Figure 2 and Figure 3 show more qualitative examples of our multimodal alignment results of our  
98 models. We visualize the multimodal attention maps on images corresponding to concept triplets  
99 using Grad-cam designed by [12]. Following our model architecture, the caption is parsed and  
100 integrated with knowledge triplets. The right bottom subfigure in our model in Figure 2 and Figure 3

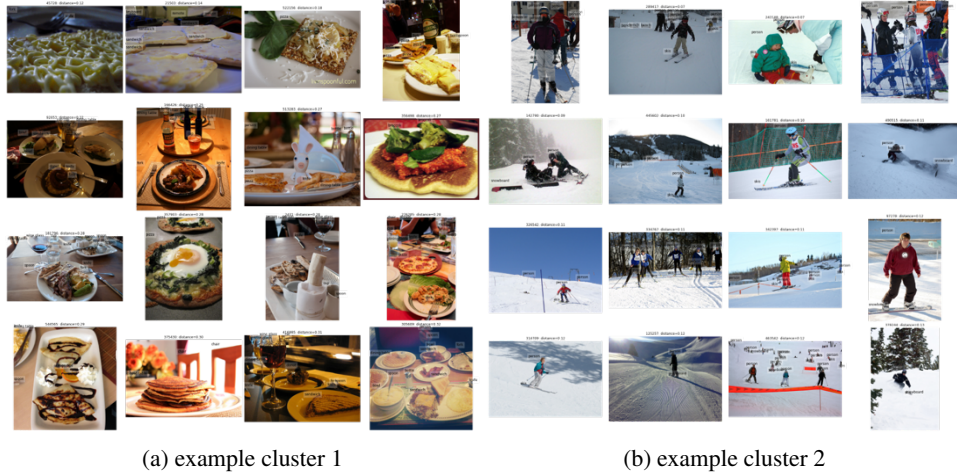

Figure 1: Example images in the clusters on COCO val set.

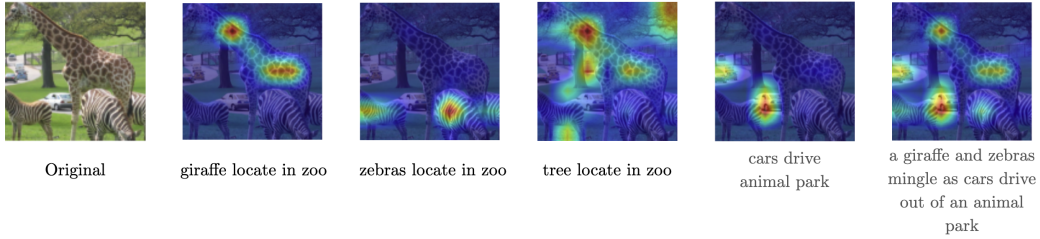

Figure 2: Visualization of the attention maps of image feature  $v_q$  and language features  $l_j$  of external knowledge alignment. The results are from our VKOOD-ViLT model. The original sample caption is “a giraffe and zebras mingle as cars drive out of an animal park”. We highlight areas in the example image corresponding to different knowledge triplets. Comparing with the attention maps of the baseline model, our model learns object shapes such as zebras and localize those objects correctly.

101 are the multimodal alignment of original captions from MSCOCO [5] dataset. Other subfigures show  
 102 the alignments of extracted triplets on the image.

103 Interestingly, we find that our model is able to capture concept “plug” as a part of “refrigerator” or  
 104 “microwave” in Figure 2. The heatmap area of “plug” and “microwave” in Figure 2 clearly suggest  
 105 that our model has the capability to exploit different relevance between visual and corresponding  
 106 conceptual text features. By contrast, the baseline results have not shown the relation between  
 107 plug and microwave. In Figure 3, it shows that we detect three zebras comparing with baseline,  
 108 but counting cars is not performing well as we expected – since the size (or scale) of cars is not  
 109 sufficiently high, and moreover some parts of them are occluded.

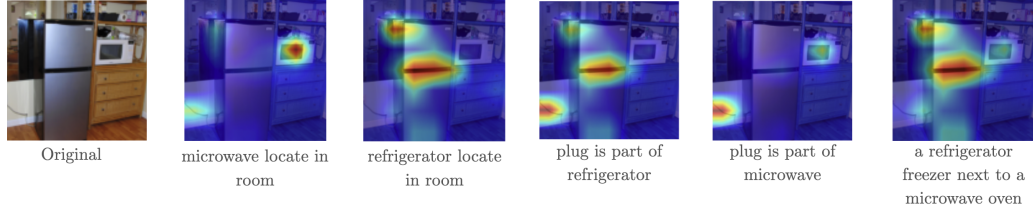

Figure 3: Visualization of the attention maps of image and knowledge concept triplets alignment. The results are from our VKOOD-ViLT model. The original sample caption is “a metallic refrigerator freezer next to a microwave oven”. We highlight areas in the example image corresponding to different knowledge triplets. Comparing with the attention maps of the baseline model, our model learns the relations between the parts (i.e., plug) of the objects correctly.

## References

- [1] S. Antol, A. Agrawal, J. Lu, M. Mitchell, D. Batra, C. L. Zitnick, and D. Parikh. Vqa: Visual question answering. In *Proceedings of the IEEE international conference on computer vision*, pages 2425–2433, 2015.
- [2] E. D. Cubuk, B. Zoph, J. Shlens, and Q. V. Le. Randaugment: Practical automated data augmentation with a reduced search space. In *Proceedings of the IEEE/CVF Conference on Computer Vision and Pattern Recognition Workshops*, pages 702–703, 2020.
- [3] J. Devlin, M.-W. Chang, K. Lee, and K. Toutanova. Bert: Pre-training of deep bidirectional transformers for language understanding. *arXiv preprint arXiv:1810.04805*, 2018.
- [4] R. Krishna, Y. Zhu, O. Groth, J. Johnson, K. Hata, J. Kravitz, S. Chen, Y. Kalantidis, L.-J. Li, D. A. Shamma, et al. Visual genome: Connecting language and vision using crowdsourced dense image annotations. *International journal of computer vision*, 123(1):32–73, 2017.
- [5] T.-Y. Lin, M. Maire, S. Belongie, J. Hays, P. Perona, D. Ramanan, P. Dollár, and C. L. Zitnick. Microsoft coco: Common objects in context. In *European conference on computer vision*, pages 740–755. Springer, 2014.
- [6] Y. Liu, M. Ott, N. Goyal, J. Du, M. Joshi, D. Chen, O. Levy, M. Lewis, L. Zettlemoyer, and V. Stoyanov. Roberta: A robustly optimized bert pretraining approach. *arXiv preprint arXiv:1907.11692*, 2019.
- [7] I. Loshchilov and F. Hutter. Decoupled weight decay regularization. In *International Conference on Learning Representations*, 2018.
- [8] K. Marino, M. Rastegari, A. Farhadi, and R. Mottaghi. Ok-vqa: A visual question answering benchmark requiring external knowledge. In *Conference on Computer Vision and Pattern Recognition (CVPR)*, 2019.
- [9] V. Ordonez, G. Kulkarni, and T. Berg. Im2text: Describing images using 1 million captioned photographs. *Advances in neural information processing systems*, 24, 2011.
- [10] B. A. Plummer, L. Wang, C. M. Cervantes, J. C. Caicedo, J. Hockenmaier, and S. Lazebnik. Flickr30k entities: Collecting region-to-phrase correspondences for richer image-to-sentence models. In *Proceedings of the IEEE international conference on computer vision*, pages 2641–2649, 2015.
- [11] A. Radford, J. W. Kim, C. Hallacy, A. Ramesh, G. Goh, S. Agarwal, G. Sastry, A. Askell, P. Mishkin, J. Clark, et al. Learning transferable visual models from natural language supervision. In *International Conference on Machine Learning*, pages 8748–8763. PMLR, 2021.
- [12] R. R. Selvaraju, M. Cogswell, A. Das, R. Vedantam, D. Parikh, and D. Batra. Grad-cam: Visual explanations from deep networks via gradient-based localization. In *Proceedings of the IEEE international conference on computer vision*, pages 618–626, 2017.

- 145 [13] R. Speer, J. Chin, and C. Havasi. Conceptnet 5.5: An open multilingual graph of general  
146 knowledge. In *Thirty-first AAAI conference on artificial intelligence*, 2017.
- 147 [14] A. Suhr, S. Zhou, A. Zhang, I. Zhang, H. Bai, and Y. Artzi. A corpus for reasoning about natural  
148 language grounded in photographs. *arXiv preprint arXiv:1811.00491*, 2018.
- 149 [15] A. Vaswani, N. Shazeer, N. Parmar, J. Uszkoreit, L. Jones, A. N. Gomez, Ł. Kaiser, and  
150 I. Polosukhin. Attention is all you need. In *Advances in neural information processing systems*,  
151 pages 5998–6008, 2017.
